# Supplementary material for: Patients’ risk factors for periprosthetic joint infection in primary total hip arthroplasty: a meta-analysis of 40 studies
Source: Springer Nature journal article supplement (doi:10.1186/s12891-021-04647-1), 2021-09-12
Supplement: MOESM1 [file 19655704]

Table S1. Methodological quality assessment of the included trials

| Author                  | representativeness | comparability | ascertainment of outcome | Score |
|-------------------------|--------------------|---------------|--------------------------|-------|
| Bozic, 2014             | 3                  | 2             | 2                        | 7     |
| Burn,2018               | 3                  | 2             | 2                        | 7     |
| Chee, 2010              | 4                  | 0             | 1                        | 5     |
| Choong, 2007            | 3                  | 0             | 2                        | 5     |
| Cordero-Ampuero, 2010   | 3                  | 0             | 2                        | 5     |
| Dale, 2011              | 3                  | 2             | 2                        | 7     |
| Davis, 2011             | 4                  | 2             | 2                        | 8     |
| de Boer, 2001           | 3                  | 2             | 1                        | 6     |
| Dowsey, 2008            | 3                  | 0             | 2                        | 5     |
| Gittings,2017           | 3                  | 2             | 1                        | 6     |
| Gonzalez,2018           | 3                  | 2             | 2                        | 7     |
| Hartford, 2020          | 3                  | 1             | 2                        | 6     |
| Huotari, 2007           | 3                  | 0             | 2                        | 5     |
| Jamsen, 2012            | 3                  | 2             | 2                        | 7     |
| Jung                    | 3                  | 1             | 2                        | 6     |
| Kildow,2017             | 3                  | 1             | 2                        | 6     |
| Kurtz,2018              | 3                  | 2             | 2                        | 7     |
| Lenguerrand,2018        | 4                  | 2             | 2                        | 8     |
| Lubbeke, 2007           | 4                  | 2             | 1                        | 7     |
| Maoz, 2015              | 3                  | 2             | 1                        | 6     |
| Marjo, 2007             | 4                  | 2             | 1                        | 7     |
| Matar, 2020             | 3                  | 1             | 2                        | 6     |
| McIntosh, 2006          | 3                  | 2             | 1                        | 6     |
| Meermans, 2012          | 3                  | 0             | 2                        | 5     |
| Muilwijk, 2006          | 3                  | 2             | 2                        | 7     |
| Namba, 2012             | 3                  | 2             | 2                        | 7     |
| Ong, 2009               | 4                  | 2             | 1                        | 7     |
| Peel, 2011              | 3                  | 0             | 2                        | 5     |
| Rondon,2018             | 3                  | 1             | 2                        | 6     |
| Sequeira, 2020          | 3                  | 2             | 2                        | 7     |
| Sequeira,S, 2020        | 4                  | 1             | 1                        | 6     |
| Smith,2018              | 3                  | 2             | 2                        | 7     |
| Sodhi, 2020             | 3                  | 1             | 2                        | 6     |
| Sodhi,N 2020            | 3                  | 2             | 2                        | 7     |
| Song, 2012              | 3                  | 2             | 2                        | 7     |
| Surin, 1983             | 3                  | 0             | 2                        | 5     |
| Tai, 2014               | 4                  | 0             | 1                        | 5     |
| Triantafyllopoulos,2018 | 3                  | 2             | 2                        | 7     |
| Vannini, 1984           | 3                  | 0             | 2                        | 5     |
| Wilson 2020             | 3                  | 1             | 1                        | 5     |

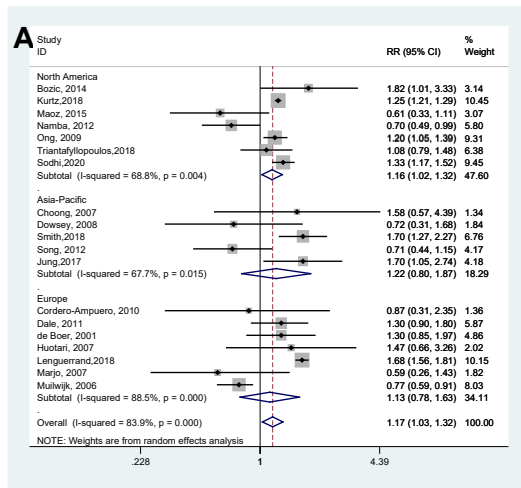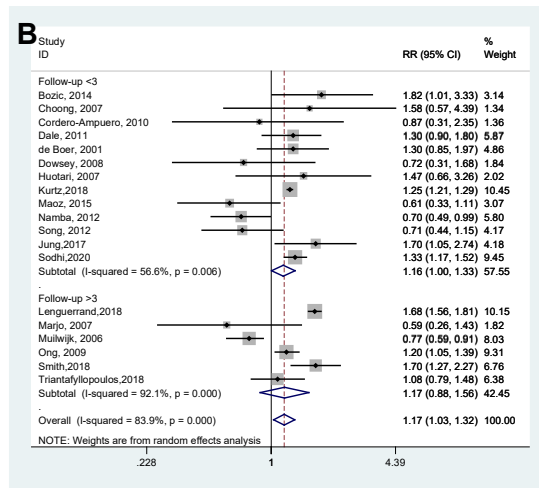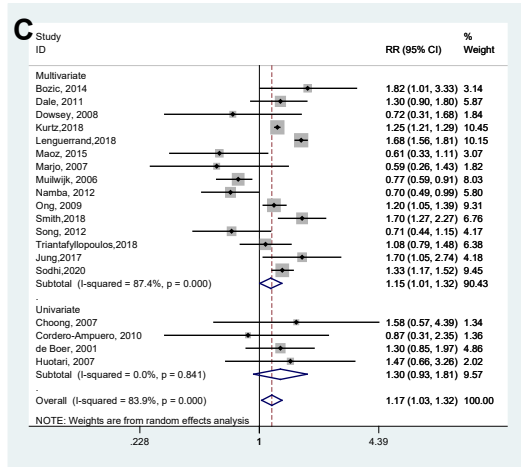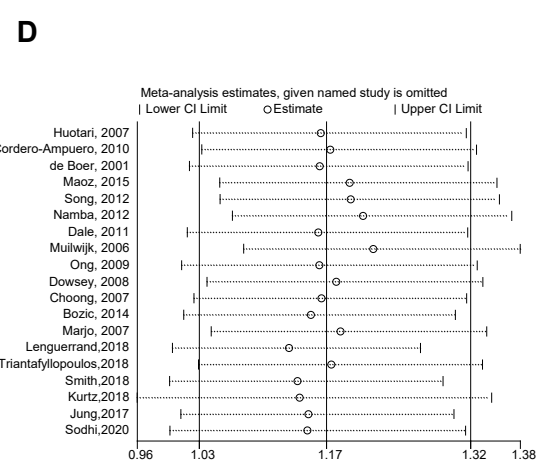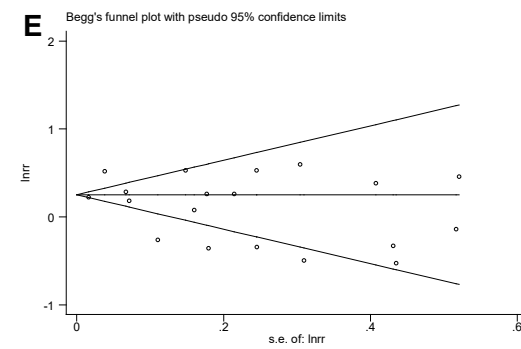

Figure S1.

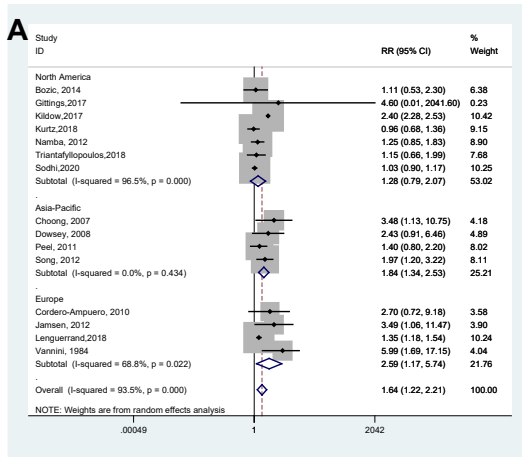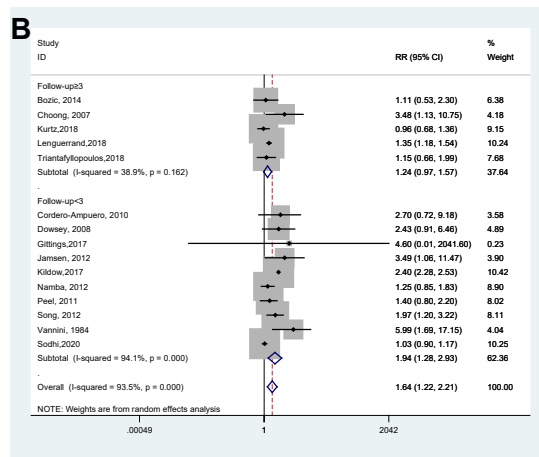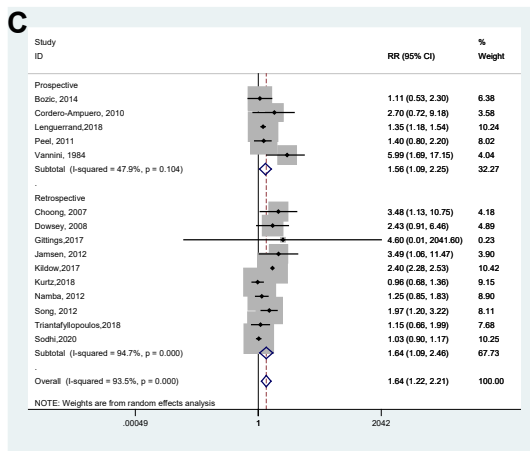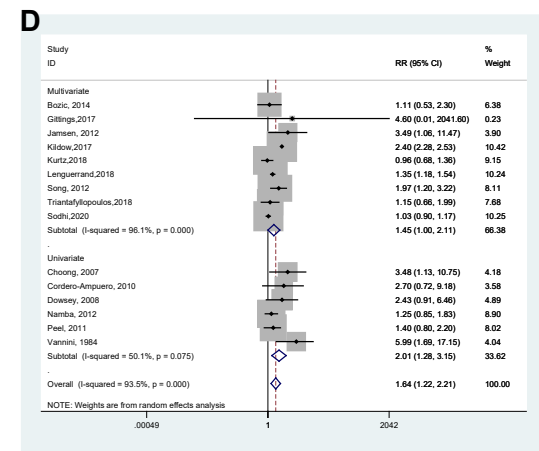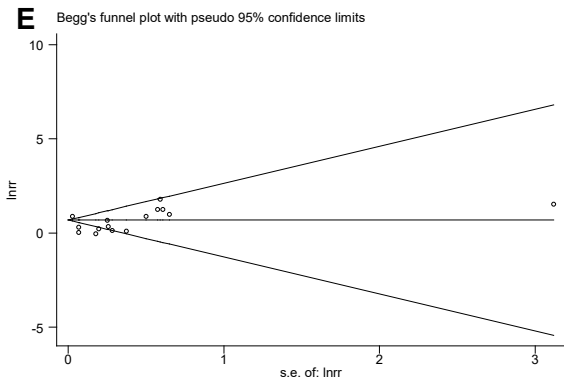

Figure S2

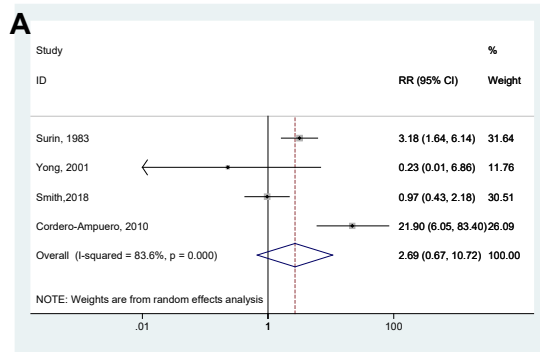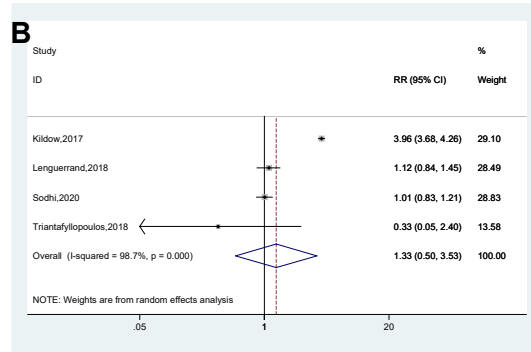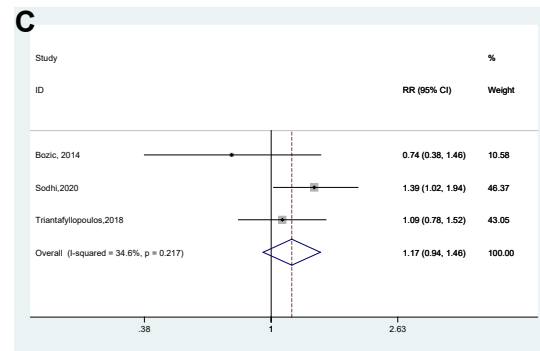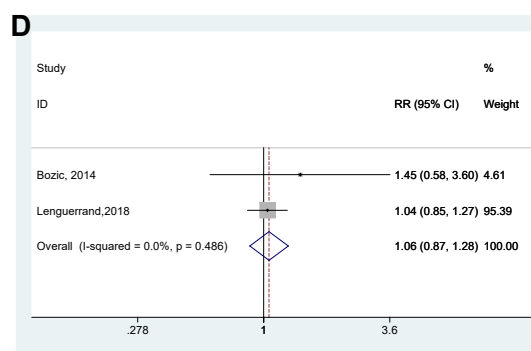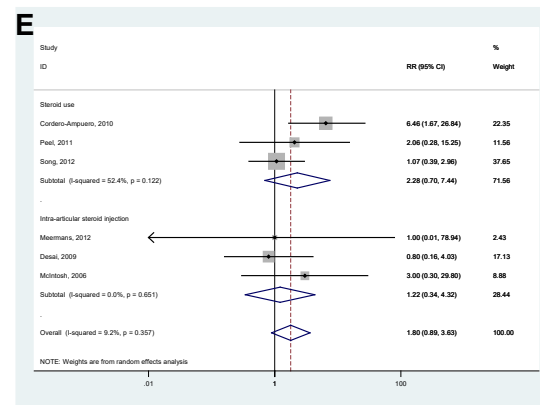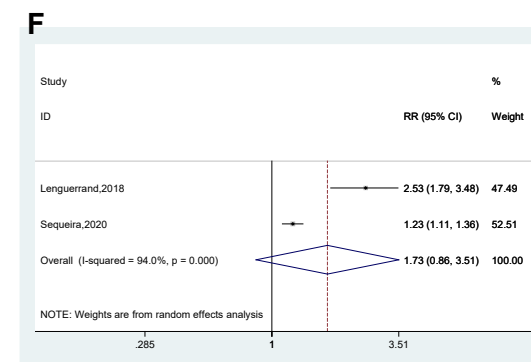

Figure S3
